# Supplementary material
Source: Springer Nature journal article supplement (https://www.springermedizin.de/resource/supplementary/12879_2014_3741_MOESM2_ESM.pdf/9446580)

# Period between Xpert and culture samples

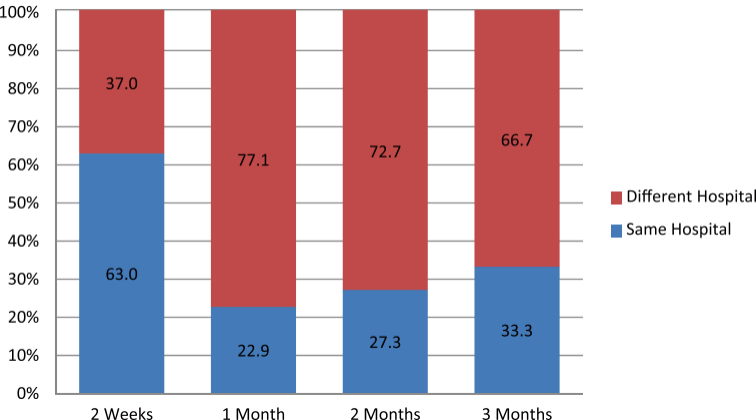

Supplement: MOESM2 [file 9446580]
